# Supplementary material
Source: HighWire-hosted journal article supplement (doi:10.1101/rna.053389.115)
Supplement: SuppFigLegends.docx [file SuppFigLegends.docx]

**Supplemental Figure S1: Graphical representation of histone genes identified by each of the different genome-wide analyses in HeLa cells.** Dark rectangles indicate the gene was found to significantly enriched, white rectangles indicate it was not enriched. RIP-Chip 2006 Agilent DNA microarray, Recombinant RIP-Chip Stanford DNA microarray and RIP-Chip 2006 Stanford microarray were as previously described (Townley-Tilson et al., 2006). The RIP-Chip 2014 Agilent DNA microarray, RIP-Seq 2014 and HITS-CLIP 2014 are all analyses from this manuscript. These data were used to generate the circos plot in Figure 1B. The raw output files for each analysis can be found as supplemental data files S1 – S3; A tab-delimited version is available as supplemental data file S4.

**Supplemental Figure S2: The effects of including multi-mapping reads in the read coverage calculation for *HIST1H3F*.** **A. – B.** The analysis of the public PolyA- RNA-Seq dataset of Yang *et al* (Yang et al., 2011) is shown in (**A**) and (**B**). Multi-mapping reads are included in the read coverage distribution shown in (A) and excluded in (B), where the read coverage distribution is calculated solely from uniquely mapping reads. **C.** The analysis of the Yang *et al.* polyA+ RNA-Seq dataset is shown for comparison. **D.** The Refseq gene model schematic depicts annotated gene features and the location of the histone stem loop. **E.** Phylop score of placental mammal sequence conservation shows the high level of conservation in the stem loop region of the *HIST1H3F* gene.

**Supplemental Figure S3: The effect of multi-mapping reads on sets of duplicated histone genes.**

**A.** The duplicated gene pair comprised of *HIST2H3A* and *HIST2H3C* encode the same mRNA. Depiction of the method used to calculate the mRNA read coverage distribution from the genome alignments. Only the reads with 100% identity solely to the duplicate gene pair were selected and mapped onto the mRNA. **B. – D.** Read coverage distributions from one of our HITS-CLIP datasets (B), one of the public PolyA- RNA-Seq datasets of Yang *et* al (Yang et al., 2011) (C), and one of our RIP-Seq datasets (D) are shown for the duplicate histone genes *HIST2H3A* and *HIST2H3C*. The duplicate genes are devoid of uniquely mapping reads. **E.** Another duplicated gene pair is comprised of *HIST2H4A* and *HIST2H4B* andmethod used to calculate the mRNA read coverage distribution from the genome alignments. Only the reads with 100% identity to the duplicate gene pair were selected and mapped onto the mRNA. **F. – H.** Read coverage distributions from one of our HITS-CLIP datasets (F), one of the public PolyA- RNA-Seq datasets of Yang *et al* (G), and one of our RIP-Seq datasets (H) are shown for the duplicate histone genes *HIST2H4A* and *HIST2H4B*. The duplicate genes are devoid of uniquely mapping reads.

**Supplemental Figure S4: Secondary analysis of a public UPF1 iCLIP dataset (Zünd et al. 2013), HIST1H2AG is shown in A – D and HIST1H2AM in panels E – H.** (**A**) UPF1 iCLIP coverage across the HIST1H2AG mRNA. RPMM is plotted in the topmost graphic and the reverse transcriptase (RT) termini are plotted below. (**B**) Our SLBP HITS-CLIP data is also shown. The RPMM is plotted in the topmost graphic. The single nucleotide deletion (1D) rate is plotted below. Our cleavage mapping algorithm was used to calculate the number of fragment termini in the plot at the bottom. (**C**) The HIST1H2AG gene model graphic indicates CDS boundaries. (**D**) The phyloP (Pollard et al. 2010) placental mammal conservation score (Meyer et al. 2013) is shown for each nucleotide of the mature HIST1H2AG mRNA. (**E**) UPF1 iCLIP coverage across the HIST1H2AM mRNA. RPMM is plotted in the topmost graphic and the reverse transcriptase (RT) termini are plotted below. (**F)** Our SLBP HITS-CLIP data is also shown. The RPMM is plotted in the topmost graphic. The single nucleotide deletion (1D) rate is plotted below. Our cleavage-mapping algorithm was used to calculate the number of fragment termini in the plot at the bottom. (**G**) The HIST1H2AM gene model graphic indicates CDS boundaries. (**H**) The phyloP(Pollard et al. 2010) placental mammal conservation score(Meyer et al. 2013) is shown for each nucleotide of the mature HIST1H2AL mRNA.

**Supplemental Figure S5: Graphical representation of the data processing and analysis pipeline.** Several pre-processing and alignment task are required before analysis using the CLIP-PyL software (available at <https://github.com/lb3/CLIP-Pyl> ). These steps and the software used are indicated graphically.

REFERENCES

Townley-Tilson,W.H., S.A.Pendergrass, W.F.Marzluff, and M.L.Whitfield. 2006. Genome-wide analysis of mRNAs bound to the histone stem-loop binding protein. *RNA* **12**: 1853-1867.

Yang,L., M.O.Duff, B.R.Graveley, G.G.Carmichael, and L.L.Chen. 2011. Genomewide characterization of non-polyadenylated RNAs. *Genome biology* **12**: R16.
