# Supplementary material
Source: HighWire-hosted journal article supplement (doi:10.1101/rna.053389.115)
Supplement: SuppTable_5_SLregexMatchesinGenome.xlsx [file SuppTable_5_SLregexMatchesinGenome.xlsx]

## Sheet: for_Bill
Supplemental Table 5: Stemloop (SL) Sequence Element Search
Custom SL core search algorithm results in HGNC histone gene models are shown
74 contain a sequence that produced a match to the SL core
A window of 67 total genomic nts encompassing the SL core is shown for each match
GENE_SYMBOL	upstream flank	16 nt SL core	downstream flank	hg19 coordinates	strand
HIST4H4	CACAGCTTCTCTACAGACTCCAAAA	GGCCCTTTTCAGGGCC	CCCAAACTGTCACAGAAAGAGCTGTT	chr12:14923631-14923698	-
HIST3H3	GAGGTTGCGCAACGTTCACCCCAAA	GGCTCTTTTAAGAGCC	ACCCACCTGGTCGAAGAGTTGCTGTA	chr1:228612527-228612594	-
HIST3H2BB	CGTTCCTCGGCGTCCTGAACCCAAA	GGCTCTTTTCAGAGCC	ACCCACACGATCAAGAAAGGGTTTCG	chr1:228646213-228646280	+
HIST3H2BA	NOMATCH	NOMATCH	NOMATCH	NOMATCH	NOMATCH
HIST3H2A	CCGGGGCCCCTTTGATGGACATAAA	GGCTCTTTTCAGAGCC	ACCTACTATCTCGAGAAAAGAGCCGC	chr1:228645043-228645110	-
HIST2H4B	CAGCTTTGCACGTTTCGATCCCAAA	GGCCCTTTTTAGGGCC	GACCACTTGCTCATCTGAGGAGTTGG	chr1:149832308-149832375	-
HIST2H4A	CAGCTTTGCACGTTTCGATCCCAAA	GGCCCTTTTTAGGGCC	GACCACTTGCTCATCTGAGGAGTTGG	chr1:149804570-149804637	+
HIST2H3PS2	TATATTTTTAAGTGGTCGATCTAAA	GGCTCTTTTCAGAGCC	ACTGCCGTTTTCATCAAGAGCAGCTG	chr1:149400062-149400129	-
HIST2H3D	CATATTTTTAAGTGGTCGATCTAAA	GGCTCTTTTCAGAGCC	ACTGCCGTTTTCATCAAGAGCAGCTG	chr1:149784756-149784823	-
HIST2H3C	GCCGGAGGTTCCATCGTATCCAAAA	GGCTCTTTTCAGAGCC	ACCCACATCAGCACTTGGAAGAAGCT	chr1:149812237-149812304	-
HIST2H3A	GCCGGAGGTTCCATCGTATCCAAAA	GGCTCTTTTCAGAGCC	ACCCACATCAGCACTTGGAAGAAGCT	chr1:149824641-149824708	+
HIST2H2BF	AATAGATCAACCACCTAACCCCAAA	GGCTCTTTTCAGAGCC	ACTTCAGTAATCGAGAAAGCAGCTGT	chr1:149783413-149783480	-
HIST2H2BE	GAGTCGCCGGCTGCTTGACTCCAAA	GGCTCTTTTCAGAGCC	ACCCACCTAATCACTAGAAAAGAGCT	chr1:149857711-149857778	-
HIST2H2BD	GGTCGCCGGCTGCTTTGTCTCCAAA	GGCTCTTTTCAGGGCC	ACTTAACCCCGTTAGTGAAATAAGCT	chr1:149815036-149815103	+
HIST2H2BC	GGTCGCCGGCTGCTTTGTCTCCAAA	GGCTCTTTTCAGGGCC	ATTTAACCACCTCAGTTAAAGAATCT	chr1:149821842-149821909	-
HIST2H2BB	NOMATCH	NOMATCH	NOMATCH	NOMATCH	NOMATCH
HIST2H2BA	AATAGATCAACCACCTAACCCCAAA	GGCTCTTTTCAGAGCC	ACTTCAGTAATTGAGAAAGCAGCTGT	chr1:120906440-120906507	+
HIST2H2AC	TGCAGACAAACAAACCAAGACCAAA	GGCTCTTTTTAGAGCC	ACCCAAGTTTTCAAAAAAAGAGCTAA	chr1:149858915-149858982	+
HIST2H2AB	TGACACCATACTCATTCACCCCAAA	GGCTCTTTTAAGAGCC	ACCAAAGTGTCAAATGAAGGGCTGAT	chr1:149858996-149859063	-
HIST2H2AA4	CGAAGGGGCACCTGTGAACTCAAAA	GGCTCTTTTCAGAGCC	ACCCACGTTTTCAAATAAAAGAGTTG	chr1:149823115-149823182	+
HIST2H2AA3	CGAAGGGGCACCTGTGAACTCAAAA	GGCTCTTTTCAGAGCC	ACCCACGTTTTCAAATAAAAGAGTTG	chr1:149813763-149813830	-
HIST1H4PS1	NOMATCH	NOMATCH	NOMATCH	NOMATCH	NOMATCH
HIST1H4L	TTACTTACTTACACGGTTCCTCAAA	GGCCCTTCTCAGGGCC	ACCCATGAAGTCTGTGAAAGAGCTGT	chr6:27840904-27840971	-
HIST1H4K	TGAGCGTCCCTTTCTATCAACAAAA	GGCCCTTTTTAGGGCC	CCCACTTTCTCAGCTGAGGAGCCGTG	chr6:27798929-27798996	-
HIST1H4J	TGAGCGTCCCTTTCTATCAATAAAA	GGCCCTTTTCAGGGCC	ACCCTACTTTCTCAGCTGAAGAGTGG	chr6:27792211-27792278	+
HIST1H4I	TTGAAGCCCAGTCATTCTCTAAAAA	GGCCCTTTTTAGGGCC	CCTAAGCTTTCAACAAAAGAGTTGAA	chr6:27107407-27107474	+
HIST1H4H	ACTCTTATTTTCATTTTCAACCAAA	GGCCCTTTTCAGGGCC	GCCCACTTTTTTCATAAAAGAGCAGA	chr6:26285332-26285399	-
HIST1H4G	GGCCTTTCCTTGCAATATCGTTAAT	GGCCCTTTTCAGGGCC	GCGTACGTTTTCTTCCGAAGGGCTCA	chr6:26246817-26246884	-
HIST1H4F	TTTATTTAACAGCTCACCCATAAAA	GGCCCTTTTCAGGGCC	ACCTCCTTCGTCACACGAAGGGCTGT	chr6:26240980-26241046	+
HIST1H4E	CAGCATCTCGACTTCCCAAATCAAA	GGCCCTTTTCAGGGCC	GCCCACAGTTTTCCGCAAAAGAGCTC	chr6:26205203-26205270	+
HIST1H4D	TACAGTACACTACCGCAAAACCAAC	GGCCCTTTTCAGGGCC	ACCTATCCACTCAGGAGAAAGAGTAG	chr6:26188916-26188983	-
HIST1H4C	AAAAACAAAAACAAAAAAACCCAAA	GGCCCTTTTCAGGGCC	GCTCACAAAGTCGTTTAAAGAGCTGA	chr6:26104519-26104586	+
HIST1H4B	ATCTTTTCGTCAGTTTTCTTCCAAT	GGCCCTTTTCAGGGCC	GCCCACTCCCTCTCAGAAAGAGCTGT	chr6:26027102-26027169	-
HIST1H4A	CCACAGCTTGCATTTCTGAACCAAA	GGCCCTTTTCAGGGCC	GCCCAACTAAACAAAAGAAGAGCTGT	chr6:26022232-26022299	+
HIST1H3PS1	NOMATCH	NOMATCH	NOMATCH	NOMATCH	NOMATCH
HIST1H3J	TCTTAATTGCTTCCAAGCTTCCAAA	GGCTCTTTTCAGAGCC	ACTTACATTCTCACTGAGGATAGCTG	chr6:27858071-27858138	-
HIST1H3I	CCAAGAAGTCTGTCCAACCCCAAAA	GGCTCTTTTCAGAGCC	CCTCAATTGTCACCAAAAGGAAGCTG	chr6:27839601-27839668	-
HIST1H3H	AGGACTCACTGATTACATACCCAAA	GGCTCTTTTCAGAGCC	ACCCACATGCGCGCTGAAAAGATCTG	chr6:27778268-27778335	+
HIST1H3G	GCAGTAATTCTATCCAACTTAAAAA	GGCTCTTTTAAGAGCC	GCCTACTTTCACCCGAAAATAGCTGT	chr6:26271124-26271191	-
HIST1H3F	AGGGTGTGCGCCAACTTAAACCAAA	GGCTCTTTTCAGAGCC	ACCAACAATTTCAGTTGAAAGCGCCG	chr6:26250346-26250413	-
HIST1H3E	TTTGAGTACAAACCTTAAATCCAAA	GGCTCTTCTCAGAGCC	AACCACTTTGTCCGTGAAAAGGGCTG	chr6:26225798-26225865	+
HIST1H3D	GAATGTGTGCTAACCAAAACCCAAA	GGCTCTTTTCAGAGCC	AACCACCTTTTCTATAAAAGTTGCTG	chr6:26196990-26197057	-
HIST1H3C	CTGCCCGTTTCTTCCTCATTGAAAA	GGCTCTTTTCAGAGCC	ACTCACAATTTCACTTAAAAACAGTT	chr6:26046051-26046118	+
HIST1H3B	TTTTTCATCAGTCTTAAAACCCAAA	GGCTCTTTTCAGAGCC	ACCCACTTATTCCAACGAAAGTAGCT	chr6:26031798-26031865	-
HIST1H3A	TGGTCTCTCTGACGGTCCAAGCAAA	GGCTCTTTTCAGAGCC	ACCACCTTTTCAAGTAAAGTAGCTGT	chr6:26021134-26021201	+
HIST1H2BPS2	NOMATCH	NOMATCH	NOMATCH	NOMATCH	NOMATCH
HIST1H2BPS1	NOMATCH	NOMATCH	NOMATCH	NOMATCH	NOMATCH
HIST1H2BO	CTCTCGCAGCTGCCAGCAATCCAAA	GGCTCTTTTCAGAGCC	ACTCACGCTTCCAGAGAAAGAGCCTG	chr6:27861622-27861689	+
HIST1H2BN	GGTCAGTCTCGGCCCACACCCCAAA	GGCTCTTTTCAGAGCC	ACTCAGTCTTCCCAAAGAGAACTGGC	chr6:27806842-27806909	+
HIST1H2BM	GTTCCGCCGTGACCCACACCCCAAA	GGCTCTTTTCAGAGCC	GTCCACGTTTCTCAAGAAAGAGCCAG	chr6:27783221-27783288	+
HIST1H2BL	TTCTCAAGCTCTTGTCCAACCCAAA	GGCTCTTTTCAGAGCC	ACTCACTATTATCTAAAGAAGAGCTG	chr6:27775235-27775302	-
HIST1H2BK	AAGCGTCTTAAAGCCCAACCCCAAA	GGCTCTTTTAAGAGCC	ACTTAAATTATCGATATTAGAGCTGT	chr6:27114118-27114185	-
HIST1H2BJ	TTGGTTGCAAACTCTCAACCCTAAC	GGCTCTTTTAAGAGCC	ACCCATGTTCTCAAAGAAAGAGCTGG	chr6:27100073-27100140	-
HIST1H2BI	TGGGTAAAAGCGCTAACGACCCAAA	GGCTCTTCTAAGAGCC	ACCCATGTTGTCATTTAAAGATCTGT	chr6:26273594-26273661	+
HIST1H2BH	AAATGGACGCATGTTCAAACCCAAA	GGCTCTTTTCAGAGCC	ACTTAATGATTTCAATTAAGAGTTTT	chr6:26252257-26252324	+
HIST1H2BG	GTGCTTAGGTGCTTTAAAACTCAAA	GGCTCTTTTCAGAGCC	ACTCAAGTCTCACATAAAGAGCTTTA	chr6:26216419-26216486	-
HIST1H2BF	TAACGTCTTCATACCCAATCCCAAA	GGCTCTTTTAAGAGCC	ACCCACTTTTTCAGCTATAGAGTTGT	chr6:26200170-26200237	+
HIST1H2BE	CTGCAACTGCCTTAGTAAACCCAAA	GGCTCTTTTCAGAGCC	ACTCACCTTTTCACAATTGGAGCTAT	chr6:26184412-26184479	+
HIST1H2BD	AAGCATCTTTACACCTAATCCCAAA	GGCTCTTTTAAGAGCC	ACGCATGTTTTCAATAAATGAGTTGT	chr6:26158789-26158856	+
HIST1H2BC	AAGCGTCTTAACACCTAACCCCAAA	GGCTCTTTTAAGAGCC	ACCCAGATACCCACTAAAAGAGCTGT	chr6:26123673-26123740	-
HIST1H2BB	TTATGTAAGCACTTCCAAACCCAAA	GGCTCTTTTCAGAGCC	ACCTACTTTGTCACAAGGAGAGCTAT	chr6:26043433-26043500	-
HIST1H2BA	AAGTAAACGTCATTTCTAACCCAAA	GGCTCTTTTCAGAGCC	ACTTAAACATACTGAAACAGCTGTGG	chr6:25727527-25727594	+
HIST1H2APS5	NOMATCH	NOMATCH	NOMATCH	NOMATCH	NOMATCH
HIST1H2APS4	NOMATCH	NOMATCH	NOMATCH	NOMATCH	NOMATCH
HIST1H2APS3	NOMATCH	NOMATCH	NOMATCH	NOMATCH	NOMATCH
HIST1H2APS2	NOMATCH	NOMATCH	NOMATCH	NOMATCH	NOMATCH
HIST1H2APS1	NOMATCH	NOMATCH	NOMATCH	NOMATCH	NOMATCH
HIST1H2AM	AAAAATGTAAACTTACAAGACAAAA	GGCTCTTTTCAGAGCC	ACCCACCATTTCTACGGAAGAACTGA	chr6:27860455-27860522	-
HIST1H2AL	CCATAGAATCACTTTCCAATACAAC	GGCTCTTTTCAGAGCC	ACCTACTATTTCTGCGGGAGAGCTGG	chr6:27833530-27833597	+
HIST1H2AK	CTCATACCTCGGTCCAAACCAAAAA	GGTTCTTTTCAGAGCC	ACCTACTTTTTCACCAAGTAGAGCTG	chr6:27805636-27805703	-
HIST1H2AJ	GAGTTGAAAAGCGCATAAAAACAAA	GGCTCTTTTCAGAGCC	ACTTCAACAATCATAAAAAGATGACA	chr6:27782059-27782126	-
HIST1H2AI	GCAACTCAATCCCAAAGGAACCAAA	GGCTCTTTTCAGAGCC	ACCTACAATTTTGTGGAAGAACTGAG	chr6:27776399-27776466	+
HIST1H2AH	GAGGTTGTGAAAACTGGAAAACAAA	GGCTCTTTTCAGAGCC	ATTCTACACTGTCTTAGAGAAAGCTG	chr6:27115299-27115366	+
HIST1H2AG	CAAGTAAAATCGAGTCCAAACCAAC	GGCTCTTTTCAGGGCC	ACCCACGTCTTCTCTAAAAGAACTTA	chr6:27101268-27101335	+
HIST1H2AE	GTGATCCCGAGTCCCAGAAACCAAA	GGCTCTTTTCAGAGCC	ACCCACCTTTTCTGTAAAGTGCTGGA	chr6:26217619-26217686	+
HIST1H2AD	TODO	GGCTCTTTTCAGAGCC	TODO	chr6:26199015-26199031	-
HIST1H2AC	TCCCGGAAACGCTATCAAACCCAAA	GGCTCTTTTCAGAGCC	CCCCTACCGTTTCAAAGGAAGAGCTA	chr6:26124871-26124938	+
HIST1H2AB	CAGACAAAATCAGCCTAACAGCAAA	GGCTCTTTTCAGAGCC	ACCTACGACTTCCATTAAATGAGCTG	chr6:26033299-26033366	-
HIST1H2AA	GACTTCTGTGTCAGAAAAAACAAAA	GGCTCTTTTCAGAGCC	ACCTACCGTCTCAGAAAAAGGCTGTA	chr6:25726269-25726336	-
HIST1H1T	GAGGCCAATTTGGAAAGAACCCAAA	GGCTCTTTTAAGAGCC	ACCCACATTATTTTAAGATGGCGTAA	chr6:26107618-26107685	-
HIST1H1PS2	NOMATCH	NOMATCH	NOMATCH	NOMATCH	NOMATCH
HIST1H1PS1	NOMATCH	NOMATCH	NOMATCH	NOMATCH	NOMATCH
HIST1H1E	GCTTAGAAGCCCAACACAACCCAAA	GGCTCTTTTCAGAGCC	ACCCACCGCTCTCAGTAAAAGAGCTG	chr6:26157297-26157364	+
HIST1H1D	ACGTTCCCCTTTGAAAATTTTAAAC	GGCTCTTTTCAGAGCC	ACCCACAGGTCTCAGTCAAAAGAGCT	chr6:26234418-26234485	-
HIST1H1C	GAACGCCTACTTCTAAAACCCAAAA	GGCTCTTTTCAGAGCC	ACCACTGATCTCAATAAAAGAGCTGG	chr6:26055945-26056012	-
HIST1H1B	GTGAAAACCGCAACAAAGCCCCAAA	GGCTCTTTTCAGAGCC	ACCCAGAGACCTCTAAAAAATGGCTG	chr6:27834548-27834615	-
HIST1H1A	TAGAAGTTTCTTCTAGTAACCCAAC	GGCTCTTTTAAGAGCC	ACCTACGCATTTCAGGAAAAGAGCTG	chr6:26017238-26017305	-
H3F3C	NOMATCH	NOMATCH	NOMATCH	NOMATCH	NOMATCH
H3F3B	NOMATCH	NOMATCH	NOMATCH	NOMATCH	NOMATCH
H3F3AP2	NOMATCH	NOMATCH	NOMATCH	NOMATCH	NOMATCH
H3F3AP1	NOMATCH	NOMATCH	NOMATCH	NOMATCH	NOMATCH
H3F3A	NOMATCH	NOMATCH	NOMATCH	NOMATCH	NOMATCH
H2BFXP	NOMATCH	NOMATCH	NOMATCH	NOMATCH	NOMATCH
H2BFWT	NOMATCH	NOMATCH	NOMATCH	NOMATCH	NOMATCH
H2BFS	NOMATCH	NOMATCH	NOMATCH	NOMATCH	NOMATCH
H2BFM	NOMATCH	NOMATCH	NOMATCH	NOMATCH	NOMATCH
H2AFZP6	NOMATCH	NOMATCH	NOMATCH	NOMATCH	NOMATCH
H2AFZP5	NOMATCH	NOMATCH	NOMATCH	NOMATCH	NOMATCH
H2AFZP4	NOMATCH	NOMATCH	NOMATCH	NOMATCH	NOMATCH
H2AFZP3	NOMATCH	NOMATCH	NOMATCH	NOMATCH	NOMATCH
H2AFZP2	NOMATCH	NOMATCH	NOMATCH	NOMATCH	NOMATCH
H2AFZP1	NOMATCH	NOMATCH	NOMATCH	NOMATCH	NOMATCH
H2AFZ	NOMATCH	NOMATCH	NOMATCH	NOMATCH	NOMATCH
H2AFY2	NOMATCH	NOMATCH	NOMATCH	NOMATCH	NOMATCH
H2AFY	NOMATCH	NOMATCH	NOMATCH	NOMATCH	NOMATCH
H2AFX	CCAGGCCTCCCCATGCCACCACAAA	GGCCCTTTTAAGGGCC	ACCACCGCCCTCATGGAAAGAGCTGA	chr11:118965581-118965648	-
H2AFVP1	NOMATCH	NOMATCH	NOMATCH	NOMATCH	NOMATCH
H2AFV	NOMATCH	NOMATCH	NOMATCH	NOMATCH	NOMATCH
H2AFJ	NOMATCH	NOMATCH	NOMATCH	NOMATCH	NOMATCH
H2AFB3	NOMATCH	NOMATCH	NOMATCH	NOMATCH	NOMATCH
H2AFB2	NOMATCH	NOMATCH	NOMATCH	NOMATCH	NOMATCH
H2AFB1	NOMATCH	NOMATCH	NOMATCH	NOMATCH	NOMATCH
H1FX	NOMATCH	NOMATCH	NOMATCH	NOMATCH	NOMATCH
H1FOO	NOMATCH	NOMATCH	NOMATCH	NOMATCH	NOMATCH
H1FNT	NOMATCH	NOMATCH	NOMATCH	NOMATCH	NOMATCH
H1F0	NOMATCH	NOMATCH	NOMATCH	NOMATCH	NOMATCH
