# Supplementary material
Source: HighWire-hosted journal article supplement (doi:10.1101/rna.053389.115)
Supplement: SuppTable_6_CVCA_classdesignations.xlsx [file SuppTable_6_CVCA_classdesignations.xlsx]

## Sheet: for_Bill
Supplemental Table 6: CVCA CLASS DESIGNATIONS
Molecular Weight	Low	High	Low	High	High	Low
Mnase	Low	Low	High	High	High	High
Treatment_Label	1xS05	1xS04	1xS02	1xS01	1xG10	1xG11
HIST4H4	B	B	B	B	C	A
HIST3H3	B	C	C	B	C	C
HIST3H2BB	B	A	B	B	C	C
HIST3H2BA	A	B	B	B	C	C
HIST3H2A	A	A	A	A	A	A
HIST2H4B	B	B	B	B	C	C
HIST2H4A	B	B	B	B	C	C
HIST2H3PS2	A	A	B	B	C	C
HIST2H3D	A	A	A	A	C	C
HIST2H3C	A	A	B	B	A	C
HIST2H3A	A	A	B	B	A	C
HIST2H2BF	C	C	C	C	C	C
HIST2H2BE	C	C	C	C	C	C
HIST2H2BD	A	A	A	A	C	C
HIST2H2BC	C	C	C	C	C	C
HIST2H2BB	B	A	C	B	C	C
HIST2H2BA	C	C	C	C	C	C
HIST2H2AC	B	A	B	B	C	C
HIST2H2AB	A	B	B	B	C	A
HIST2H2AA4	A	A	B	B	A	A
HIST2H2AA3	A	A	B	B	A	A
HIST1H4PS1	EMPTY	EMPTY	EMPTY	EMPTY	EMPTY	EMPTY
HIST1H4L	A	C	B	B	C	C
HIST1H4K	B	B	B	B	C	C
HIST1H4J	B	B	B	B	C	C
HIST1H4I	B	B	B	B	C	C
HIST1H4H	B	B	B	B	C	C
HIST1H4G	C	C	B	B	C	C
HIST1H4F	B	B	B	B	C	C
HIST1H4E	B	B	B	B	C	A
HIST1H4D	B	B	B	B	C	A
HIST1H4C	A	A	B	B	EMPTY	A
HIST1H4B	B	B	B	B	EMPTY	C
HIST1H4A	B	B	B	B	C	C
HIST1H3PS1	EMPTY	EMPTY	C	B	C	B
HIST1H3J	C	C	B	B	C	C
HIST1H3I	C	C	B	B	C	C
HIST1H3H	A	A	B	B	A	C
HIST1H3G	A	A	A	A	C	C
HIST1H3F	A	A	B	B	C	C
HIST1H3E	C	C	C	C	C	C
HIST1H3D	B	B	B	B	C	A
HIST1H3C	C	B	B	B	C	C
HIST1H3B	B	B	B	B	C	C
HIST1H3A	A	A	A	A	A	C
HIST1H2BPS2	C	B	B	B	EMPTY	EMPTY
HIST1H2BPS1	A	B	B	B	EMPTY	A
HIST1H2BO	A	A	B	B	C	C
HIST1H2BN	A	A	B	B	C	C
HIST1H2BM	A	A	B	B	C	C
HIST1H2BL	A	A	B	B	C	C
HIST1H2BK	C	C	C	C	C	C
HIST1H2BJ	A	A	A	A	C	A
HIST1H2BI	A	A	A	A	C	C
HIST1H2BH	B	B	B	B	C	C
HIST1H2BG	A	A	A	A	C	C
HIST1H2BF	A	A	B	B	C	C
HIST1H2BE	B	B	B	B	C	C
HIST1H2BD	C	C	C	C	C	C
HIST1H2BC	A	A	B	B	C	C
HIST1H2BB	B	B	B	B	C	B
HIST1H2BA	B	B	B	B	EMPTY	C
HIST1H2APS5	EMPTY	C	C	C	EMPTY	C
HIST1H2APS4	A	A	C	A	C	C
HIST1H2APS3	EMPTY	EMPTY	EMPTY	EMPTY	EMPTY	EMPTY
HIST1H2APS2	C	C	C	C	C	C
HIST1H2APS1	C	C	C	C	C	C
HIST1H2AM	A	A	B	B	A	A
HIST1H2AL	A	A	B	A	C	C
HIST1H2AK	A	A	A	A	C	C
HIST1H2AJ	A	A	B	A	C	C
HIST1H2AI	A	A	B	B	C	C
HIST1H2AH	A	A	A	A	C	C
HIST1H2AG	A	A	A	A	C	C
HIST1H2AE	A	A	A	A	A	A
HIST1H2AD	A	A	A	A	A	A
HIST1H2AC	A	A	B	A	C	A
HIST1H2AB	A	A	A	A	C	C
HIST1H2AA	B	B	B	B	EMPTY	EMPTY
HIST1H1T	B	B	B	B	C	EMPTY
HIST1H1PS2	EMPTY	EMPTY	EMPTY	EMPTY	C	EMPTY
HIST1H1PS1	EMPTY	EMPTY	EMPTY	EMPTY	EMPTY	EMPTY
HIST1H1E	B	B	B	B	C	C
HIST1H1D	C	C	C	C	C	C
HIST1H1C	B	B	B	B	C	C
HIST1H1B	B	B	B	B	B	C
HIST1H1A	B	A	B	B	C	C
H3F3C	B	A	C	C	C	C
H3F3B	C	C	C	C	C	C
H3F3AP2	EMPTY	EMPTY	A	A	A	EMPTY
H3F3AP1	C	EMPTY	B	C	C	EMPTY
H3F3A	C	C	B	B	EMPTY	B
H2BFXP	EMPTY	EMPTY	C	EMPTY	EMPTY	EMPTY
H2BFWT	EMPTY	C	C	C	EMPTY	EMPTY
H2BFS	B	B	B	B	C	B
H2BFM	EMPTY	EMPTY	EMPTY	C	EMPTY	EMPTY
H2AFZP6	EMPTY	EMPTY	A	A	A	B
H2AFZP5	EMPTY	EMPTY	A	A	A	C
H2AFZP4	EMPTY	EMPTY	B	B	B	B
H2AFZP3	C	EMPTY	A	A	A	C
H2AFZP2	C	B	C	A	C	C
H2AFZP1	C	A	C	A	A	C
H2AFZ	C	B	A	B	A	C
H2AFY2	EMPTY	EMPTY	C	C	C	C
H2AFY	EMPTY	C	C	C	C	C
H2AFX	C	C	C	B	C	C
H2AFVP1	EMPTY	EMPTY	A	B	B	B
H2AFV	C	C	C	C	C	C
H2AFJ	C	C	C	C	C	C
H2AFB3	EMPTY	EMPTY	EMPTY	C	EMPTY	EMPTY
H2AFB2	EMPTY	EMPTY	EMPTY	A	EMPTY	EMPTY
H2AFB1	EMPTY	EMPTY	EMPTY	C	EMPTY	EMPTY
H1FX	EMPTY	B	C	A	C	C
H1FOO	EMPTY	EMPTY	EMPTY	EMPTY	EMPTY	EMPTY
H1FNT	EMPTY	EMPTY	EMPTY	EMPTY	EMPTY	EMPTY
H1F0	C	C	A	C	C	EMPTY
