# Supplementary material
Source: HighWire-hosted journal article supplement (doi:10.1101/rna.053389.115)

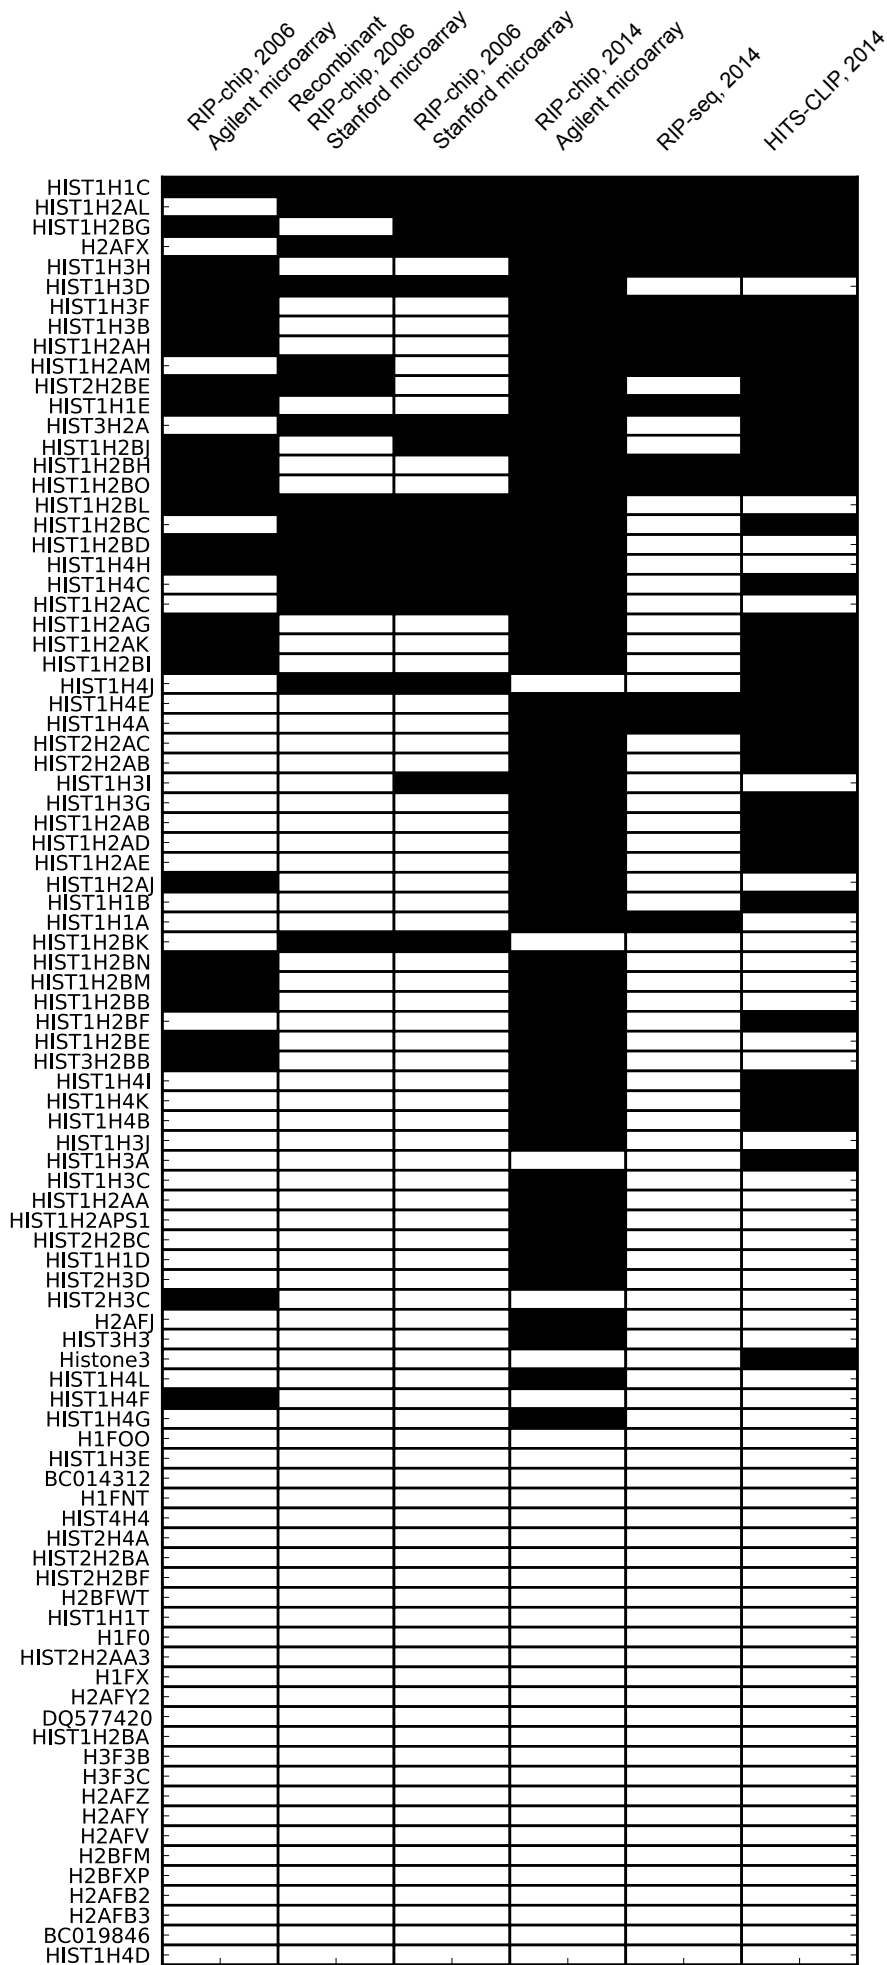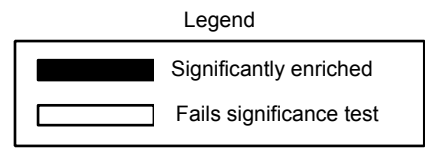

Supplemental Figure S1

A

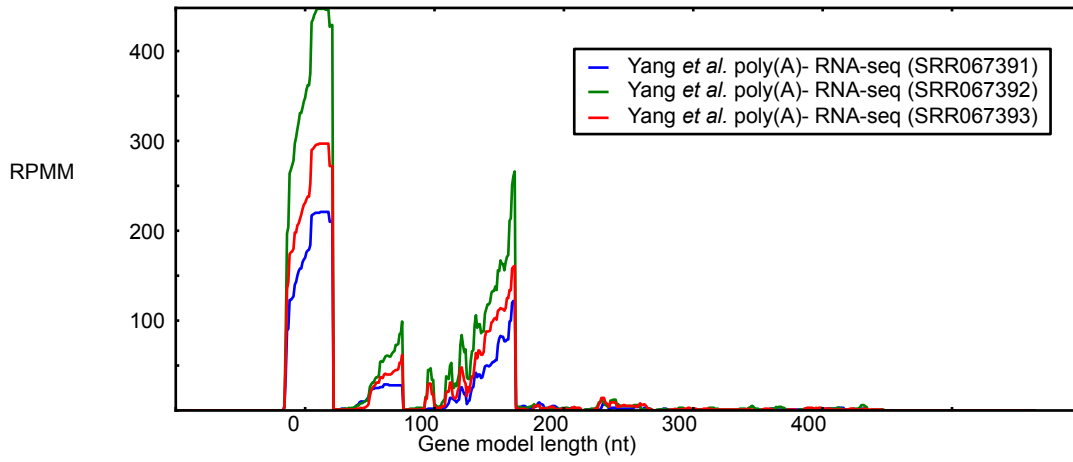

B

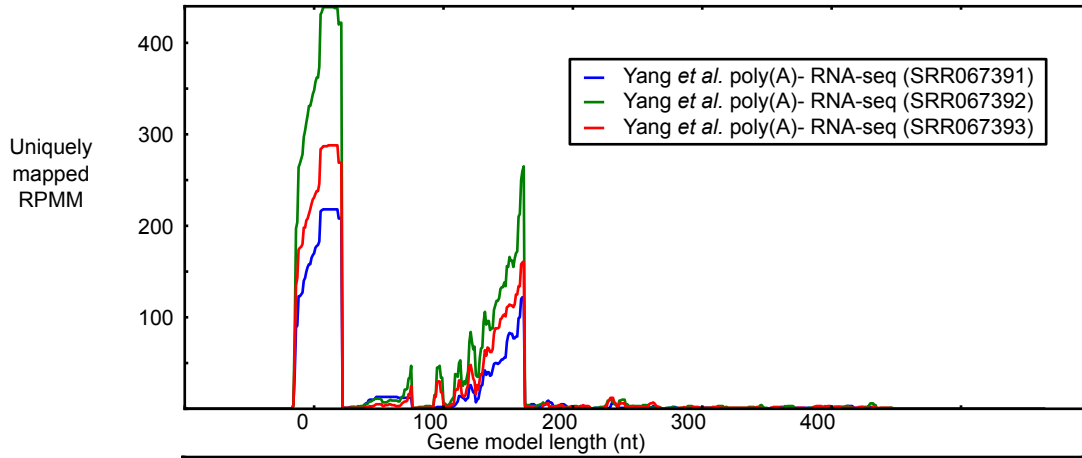

C

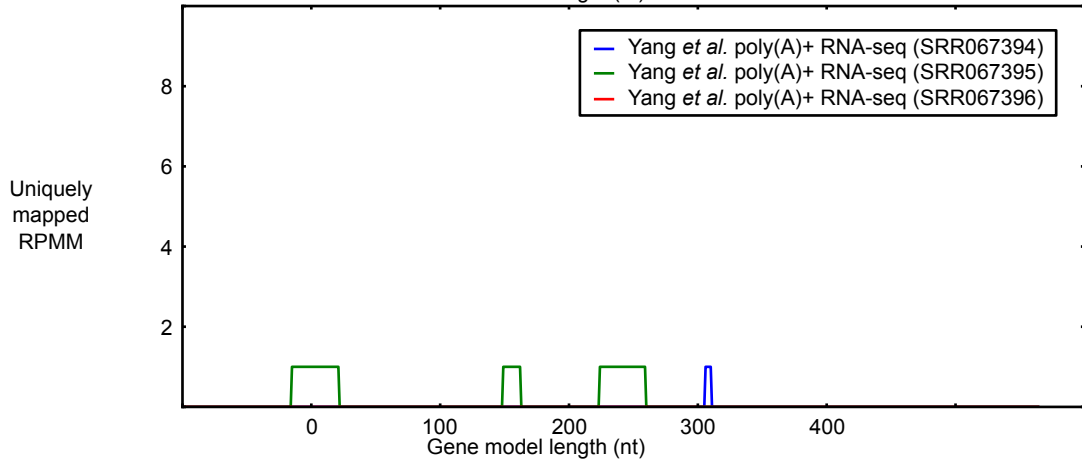

D

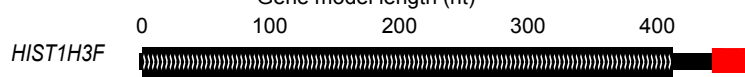

E

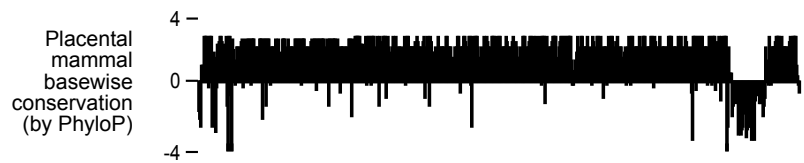

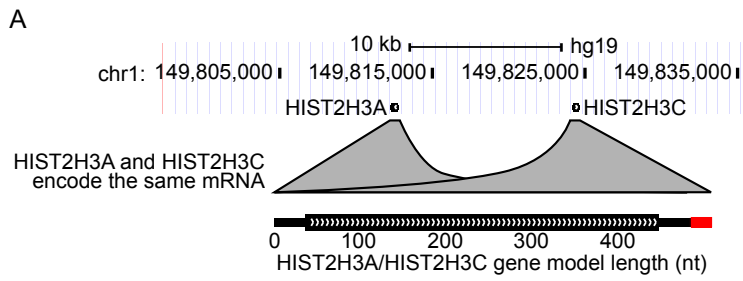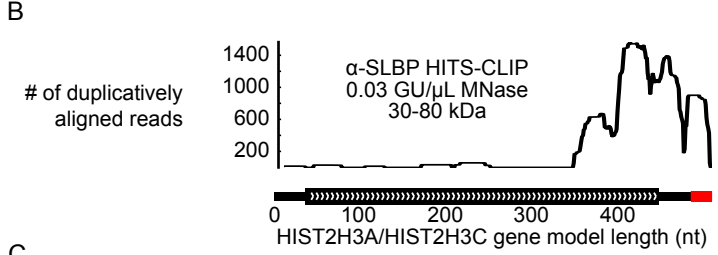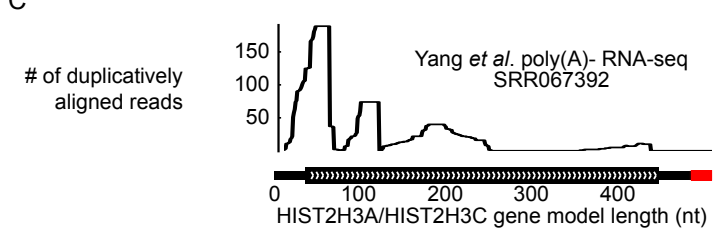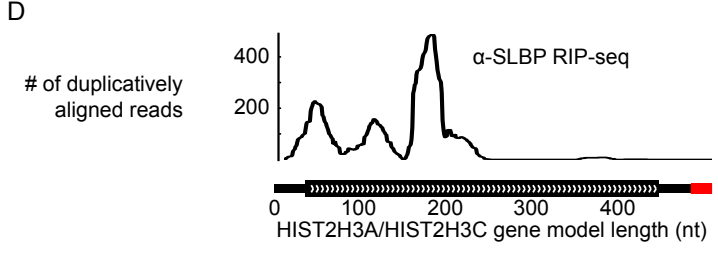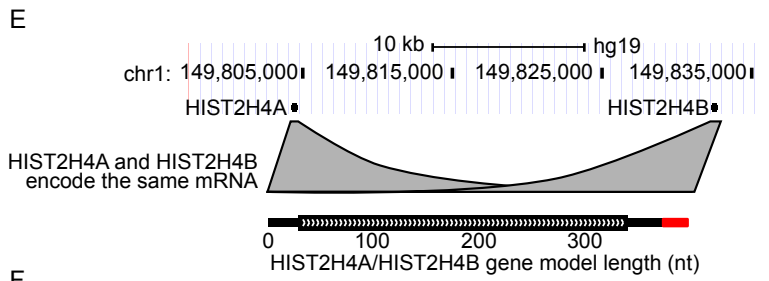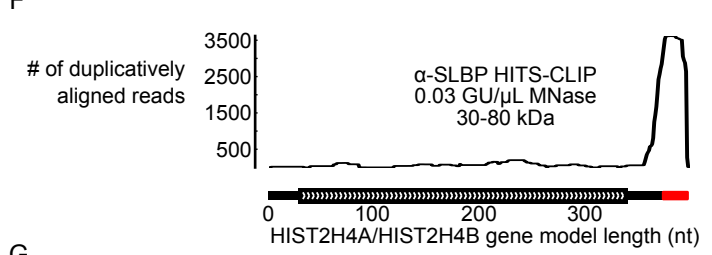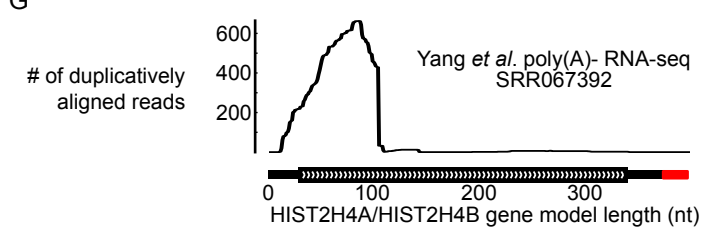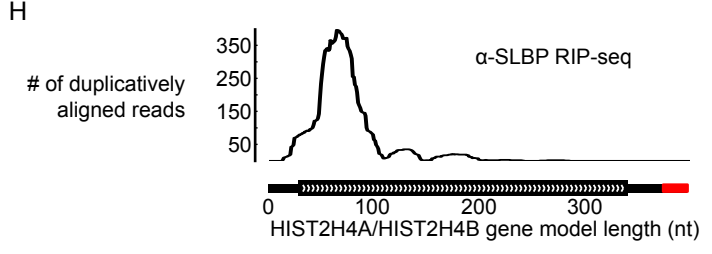

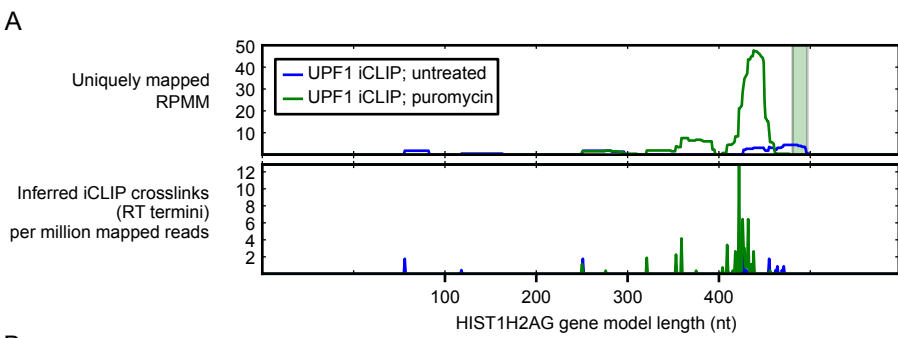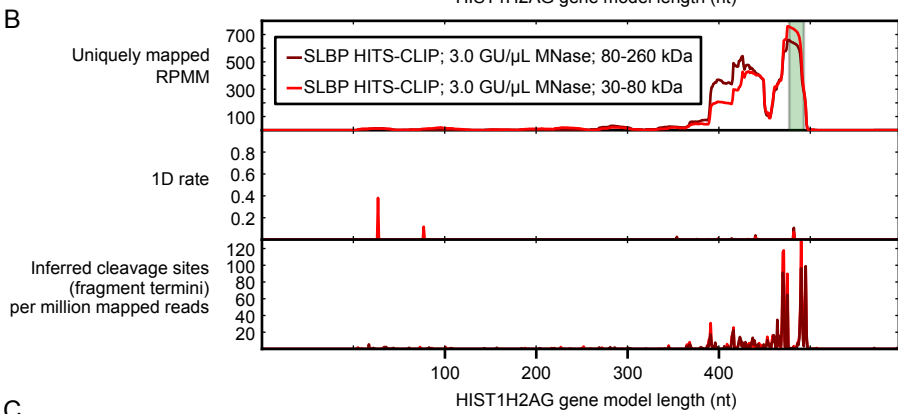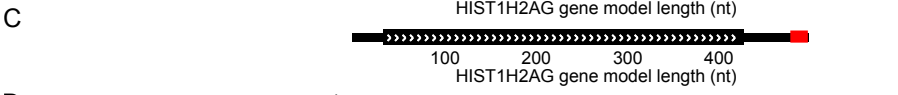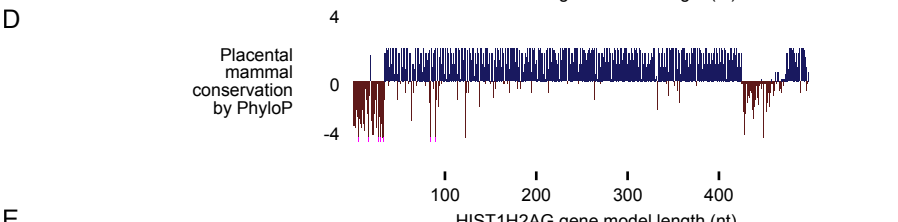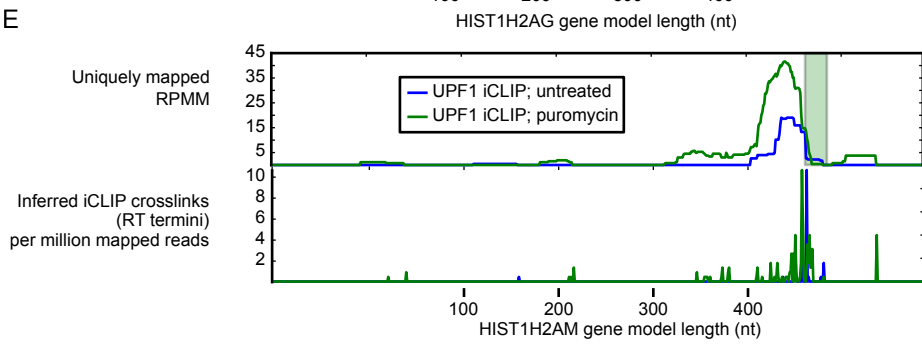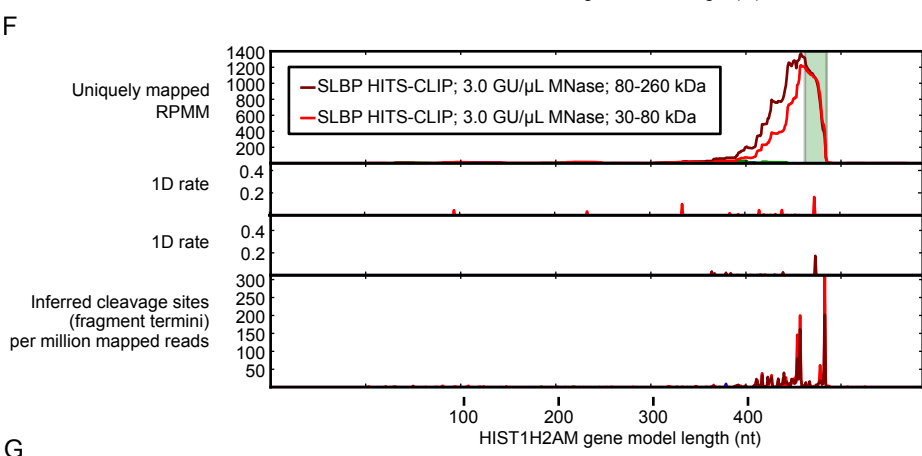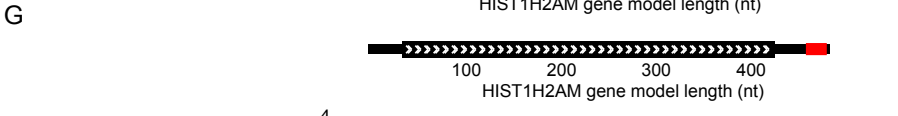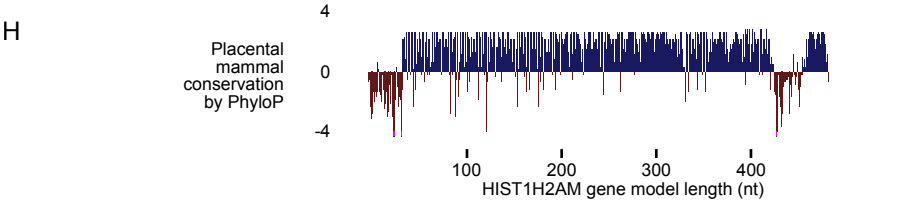

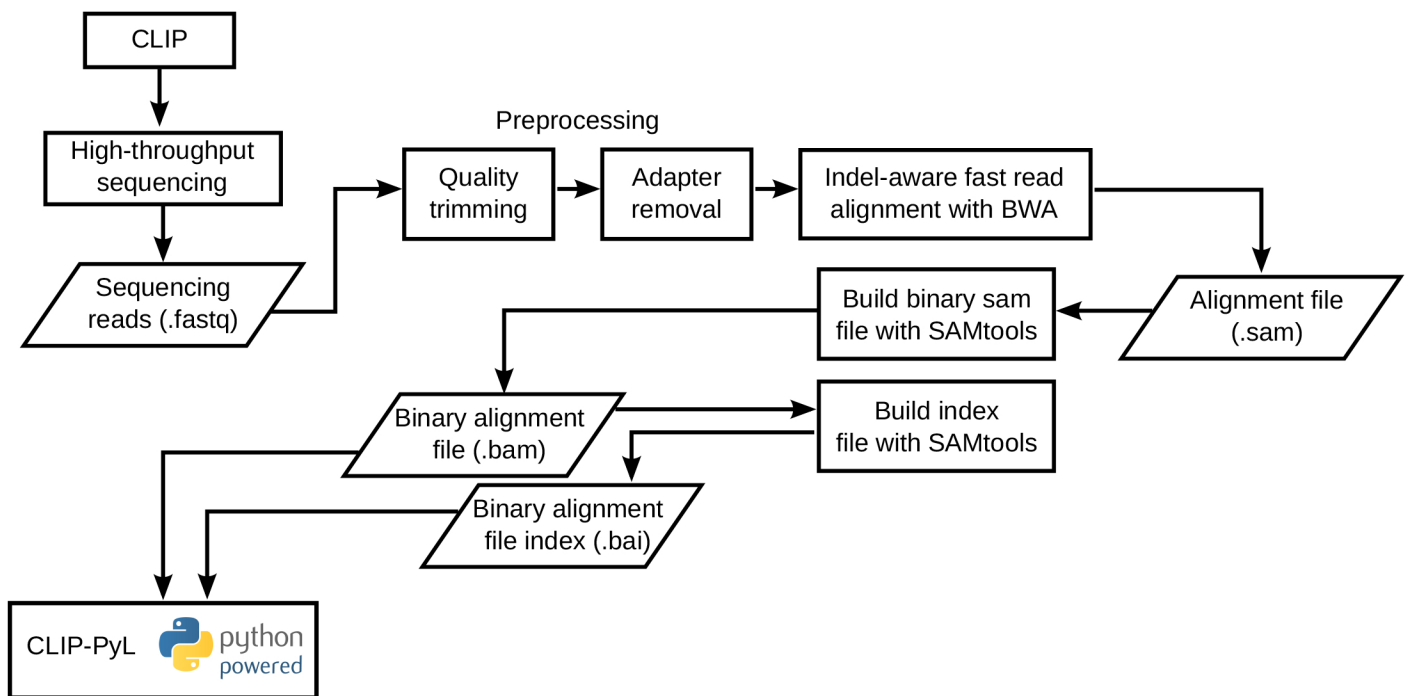

Supplement: SuppFigs_CLIPseq.pdf [file SuppFigs_CLIPseq.pdf]
